# Supplementary material
Source: Oxford University Press journal article supplement (doi:10.1093/g3journal_jkab355)
Supplement: jkab355_supplementary_figure_1.pdf [file jkab355_supplementary_figure_1.pdf]

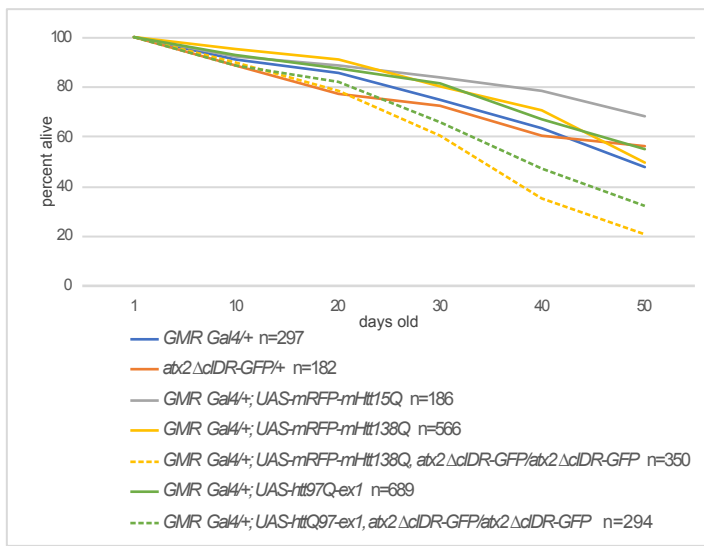

### Supplementary Figure 1: Life span of flies expressing pathogenic Htt-polyQ transgenes

Survival rate of flies expressing Htt-polyQ transgenes. Number of flies per genotype at day 1 is listed in the figure legend.
